# Supplementary material
Source: PubMed Central journal article supplement (PMC4159418)
Supplement: NIHMS585846-supplement-supplement_1.pdf [file NIHMS585846-supplement-supplement_1.pdf]

**I. CELIAC DATA COLLECTION SHEET**

**Age:** \_\_\_\_\_ **Zip Code:** \_\_\_\_\_ **Gender:** Male Female

**Race:**

- (1) American Indian or Alaska Native (2) Asian  
 (3) Black or African American (4) Native Hawaiian or Other Pacific Islander  
 (5) Caucasian (6) More than one race (Please list): \_\_\_\_\_

**Ethnicity:**

- (1) Hispanic or Latino(a) (2) Not Hispanic or Latino(a)

**Marital status:**

- (1) Single (2) Married (3) Divorced (4) Separated

**Educational Level:**

- (1) Completed Grade School (K-8) (2) Completed Some High School (No diploma)  
 (3) High School Graduate (4) Some College (No degree)  
 (5) Associate degree (6) Trade School  
 (7) Bachelor's degree (8) Master's degree  
 (9) Professional degree (10) Doctorate degree

**Are you currently employed?** (1) Full-time (2) Part-time (3) Unemployed

**Occupation:** \_\_\_\_\_

**What is your household annual income:**

<\$25,000 \$25,001-50,000 \$50,001-75,001 \$75,001-100,000 \$100,000-200,000 >\$200,000

**At what age were you diagnosed with Celiac Disease?** \_\_\_\_\_

**How was your diagnosis of celiac disease made?**

- (1) Small bowel biopsy (portion of the lining of the small intestine is removed for examination)  
 (2) Blood antibody tests  
 (3) Both

**What symptoms if any did you or do you experience related to celiac disease?**

\_\_\_\_\_

**At what age did the signs and symptoms of celiac disease (if any signs and symptoms were experienced) first appear?**

\_\_\_\_\_

**What was the approximate length of time between presentation of symptoms (if any) and when you sought medical advice?**

\_\_\_\_\_

**How long have you been following the gluten-free diet (in years and/or months)?**

\_\_\_\_\_

**What is your health insurance?**

MassHealth          Private          Medicare or Medicaid          None

**How many times have you seen your family doctor in the past year?**

0    1    2    3    4     $\geq 5$

**How many times have you seen your dietician/nutritionist in the past year?**

0    1    2    3    4     $\geq 5$

**How many times have you visited your gastroenterologist in the past year?**

0    1    2    3    4     $\geq 5$

**How many times have you been hospitalized in the past year?**

0    1    2    3     $\geq 4$

**In the past five years?**

0    1    2    3     $\geq 4$

**Do you belong to a support group for Celiac Disease?**

YES                  NO

**What factors make treatment for your Celiac Disease easier or harder? (Circle all that apply.)**

- (1) Cost of food
- (2) Eating out
- (3) Understanding and support from family and friends
- (4) Attending my support group
- (5) Seeing my physician regularly
- (6) Seeing my dietician/nutritionist regularly
- (7) How available gluten-free foods are in my local grocery store
- (8) Time limitations
- (9) Knowing enough about what it means to have a gluten-free diet
- (10) Other dietary restrictions
- (11) Other \_\_\_\_\_

| Question                                                                                                             | 1                | 2                    | 3                          | 4                  | 5                    |
|----------------------------------------------------------------------------------------------------------------------|------------------|----------------------|----------------------------|--------------------|----------------------|
| Have you been bothered by low energy level during the past 4 weeks?                                                  | None of the time | A little of the time | Some of the time           | Most of the time   | All of the time      |
| Have you been bothered by headaches during the past 4 weeks?                                                         | None of the time | A little of the time | Some of the time           | Most of the time   | All of the time      |
| I am able to follow a gluten free diet when dining outside my home                                                   | Strongly Agree   | Somewhat Agree       | Neither Agree nor Disagree | Somewhat Disagree  | Strongly Disagree    |
| Before I do something I carefully consider the consequences                                                          | Strongly Agree   | Somewhat Agree       | Neither Agree nor Disagree | Somewhat Disagree  | Strongly Disagree    |
| I do not consider myself a failure                                                                                   | Strongly Agree   | Somewhat Agree       | Neither Agree nor Disagree | Somewhat Disagree  | Strongly Disagree    |
| How important to your health are accidental gluten exposures?                                                        | Very Important   | Somewhat Important   | Neutral/ Unsure            | A Little Important | Not at All Important |
| Over the past four weeks how many times have you eaten foods containing gluten on purpose?                           | 0 (never)        | 1-2 Times            | 3-5 Times                  | 6-10 times         | More than 10 Times   |
| The cost of food make it more difficult to follow your diet.                                                         | Strongly Agree   | Somewhat Agree       | Neither Agree nor Disagree | Somewhat Disagree  | Strongly Disagree    |
| The lack of gluten-free foods at your grocery store is a problem.                                                    | Strongly Agree   | Somewhat Agree       | Neither Agree nor Disagree | Somewhat Disagree  | Strongly Disagree    |
| I would prefer to take a medicine everyday instead of follow a gluten-free diet.                                     | Strongly Agree   | Somewhat Agree       | Neither Agree nor Disagree | Somewhat Disagree  | Strongly Disagree    |
| Have you been bothered by pain or discomfort in the upper abdomen or the pit of the stomach during the past 4 weeks? | None of the time | A little of the time | Some of the time           | Most of the time   | All of the time      |
| Have you been bothered by nausea during the past 4 weeks?                                                            | None of the time | A little of the time | Some of the time           | Most of the time   | All of the time      |
| Have you been bothered by rumbling in your stomach during the past 4 weeks?                                          | None of the time | A little of the time | Some of the time           | Most of the time   | All of the time      |
| Has your stomach felt bloated during the past 4 weeks?                                                               | None of the time | A little of the time | Some of the time           | Most of the time   | All of the time      |
| Have you been bothered by diarrhea during the past 4 weeks?                                                          | None of the time | A little of the time | Some of the time           | Most of the time   | All of the time      |
| When going on the toilet, have you had the sensation of not completely emptying your bowels during the past 4 weeks? | None of the time | A little of the time | Some of the time           | Most of the time   | All of the time      |
| Have you been bothered by hunger pains during the last 4 weeks?                                                      | None of the time | A little of the time | Some of the time           | Most of the time   | All of the time      |
| Have you had food cravings in the last 4 weeks?                                                                      | None of the time | A little of the time | Some of the time           | Most of the time   | All of the time      |
| Have you had loss of appetite during the past 4 weeks?                                                               | None of the time | A little of the time | Some of the time           | Most of the time   | All of the time      |

|                                                              |                |                |                            |                   |                   |
|--------------------------------------------------------------|----------------|----------------|----------------------------|-------------------|-------------------|
| Related to Celiac Disease, how is your health?               | Excellent      | Good           | Fair                       | Poor              | Terrible          |
| Overall, how is your health?                                 | Excellent      | Good           | Fair                       | Poor              | Terrible          |
| How much physical pain have you had during the past 4 weeks? | None           | A Little       | Some                       | A Good Deal       | Very Much         |
| I am comfortable                                             | Strongly Agree | Somewhat Agree | Neither Agree nor Disagree | Somewhat Disagree | Strongly Disagree |
| I am as healthy as anybody I know                            | Strongly Agree | Somewhat Agree | Neither Agree nor Disagree | Somewhat Disagree | Strongly Disagree |

For Peer Review

To help people say how good or bad a health state is, we have drawn a scale (like a thermometer) on which the best state you can imagine is marked 100 and the worst state you can imagine is marked 0. Indicate on this scale how good or bad your own health is today by placing an "X" next to how you would score your overall health.

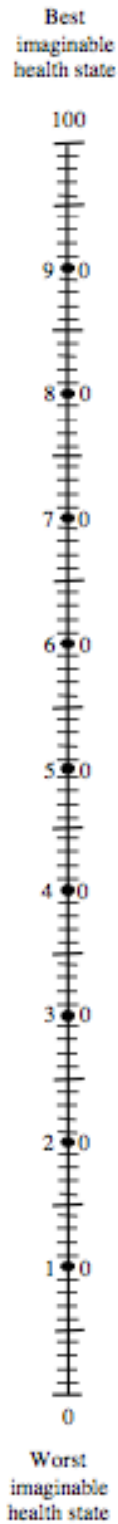

Please use the figure of a thermometer below for this next question. Now rate your health in relation to your Celiac Disease. The best state you can imagine is marked 100 and the worst state you can imagine is marked 0. Indicate on this scale how good or bad your own health is today by placing an "X" next to how you would score your health in relation to your Celiac Disease.

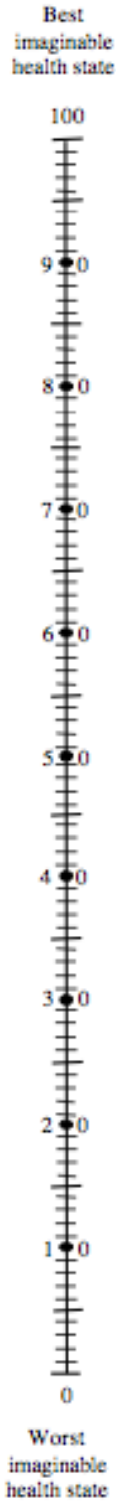

Please use the figure of a thermometer below for this next question. A score of 100 represents VERY DIFFICULT, a score of 0 represents VERY EASY . Please place an "X" next to how hard you think it is to follow your Celiac Disease treatment.

Very Difficult

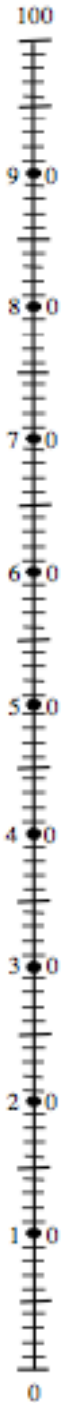

For Peer Review

Very Easy

Please use the figure of a thermometer below for this next question. A score of 100 represents VERY IMPORTANT, a score of 0 represents NOT IMPORTANT AT ALL. Please place an "X" next to how important it is to your health to follow your Celiac Disease treatment.

Very Important

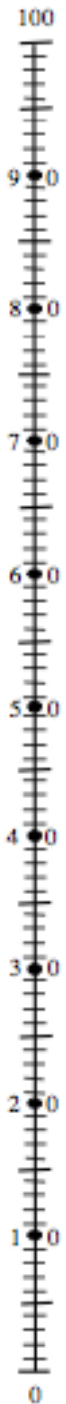

Not Important  
At All

For Peer Review



**II. GERD DATA COLLECTION SHEET**

**You have been selected for this study because you have been diagnosed with GERD (gastroesophageal reflux disease), also known as “heartburn.” Please answer the questions below with regard to your heartburn.**

**Age:** \_\_\_\_\_ **Zip Code:** \_\_\_\_\_ **Gender:** Male Female

**Race:**

- (1) American Indian or Alaska Native (2) Asian  
 (3) Black or African American (4) Native Hawaiian or Other Pacific Islander  
 (5) Caucasian (6) More than one race (Please list): \_\_\_\_\_

**Ethnicity:**

- (1) Hispanic or Latino(a) (2) Not Hispanic or Latino(a)

**Marital status:**

- (1) Single (2) Married (3) Divorced (4) Separated

**Educational Level:**

- (1) Completed Grade School (K-8) (2) Completed Some High School (No diploma)  
 (3) High School Graduate (4) Some College (No degree)  
 (5) Associate degree (6) Trade School  
 (7) Bachelor’s degree (8) Master’s degree  
 (9) Professional degree (10) Doctorate degree

**Are you currently employed?** (1) Full-time (2) Part-time (3) Unemployed

**Occupation:** \_\_\_\_\_

**What is your household annual income:**

<\$25,000 \$25,001-50,000 \$50,001-75,001 \$75,001-100,000 \$100,000-200,000 >\$200,000

**At what age were you diagnosed with Heartburn?** \_\_\_\_\_

**What symptoms if any did you or do you experience related to Heartburn?**

\_\_\_\_\_

**At what age did the signs and symptoms of Heartburn (if any signs and symptoms were experienced) first appear?**

\_\_\_\_\_

**What was the approximate length of time between presentation of symptoms (if any) and when you sought medical advice?**

\_\_\_\_\_

**How long have you been receiving treatment for Heartburn (in years and/or months)?**

\_\_\_\_\_

**What is your health insurance?** 375 Greenbrier Drive, Charlottesville, VA, 22901

MassHealth      Private      Medicare or Medicaid      None

**How many times have you seen your family doctor in the past year?**

0   1   2   3   4    $\geq 5$

**How many times have you visited a gastroenterologist in the past year?**

0   1   2   3   4    $\geq 5$

**How many times have you been hospitalized in the past year?**

0   1   2   3    $\geq 4$

**In the past five years?**

0   1   2   3    $\geq 4$

**What is your treatment for your heartburn? (Circle all that apply)**

- (1) Once a day medication (Please list \_\_\_\_\_)
- (2) Twice a day medication (Please list \_\_\_\_\_)
- (3) Lifestyle changes (for example, elevating the head of the bed, not lying down immediately after eating)
- (4) Dietary changes (for example, eating small meals, avoiding spicy or acidic foods, avoiding caffeine and alcohol)

**What factors make treatment for heartburn easier or harder? (Circle all that apply.)**

- (1) Cost of food and medicines
- (2) Eating out
- (3) Understanding and support from family and friends
- (4) Seeing my physician regularly
- (5) How available certain foods are in my local grocery store
- (6) Knowing enough about what it means to use dietary/lifestyle changes to control my symptoms
- (7) Other dietary restrictions
- (8) Medication side effects
- (9) Taking too many medicines
- (10) Other \_\_\_\_\_

| Question                                                                                     | 1              | 2              | 3                          | 4                 | 5                 |
|----------------------------------------------------------------------------------------------|----------------|----------------|----------------------------|-------------------|-------------------|
| I am able to follow my medication schedule, lifestyle changes, and diet when outside my home | Strongly Agree | Somewhat Agree | Neither Agree nor Disagree | Somewhat Disagree | Strongly Disagree |
| Before I do something I carefully consider the consequences                                  | Strongly Agree | Somewhat Agree | Neither Agree nor Disagree | Somewhat Disagree | Strongly Disagree |

|                                                                                                                               |                  |                      |                            |                    |                          |
|-------------------------------------------------------------------------------------------------------------------------------|------------------|----------------------|----------------------------|--------------------|--------------------------|
| I do not consider myself a failure                                                                                            | Strongly Agree   | Somewhat Agree       | Neither Agree nor Disagree | Somewhat Disagree  | Strongly Disagree        |
| How important to your health are mistakes in your heartburn treatment?                                                        | Very Important   | Somewhat Important   | Neutral/ Unsure            | A Little Important | Not at All Important     |
| Over the past four weeks how many times have you not followed your diet or lifestyle changes related to heartburn?            | 0 (never)        | 1-2 Times            | 3-5 Times                  | 6-10 times         | More than 10 Times       |
| Over the past four weeks how many times have you missed your heartburn medications?                                           | 0 (never)        | 1-2 Times            | 3-5 Times                  | 6 or more Times    | I don't take medications |
| Cost makes it more difficult to follow your treatment.                                                                        | Strongly Agree   | Somewhat Agree       | Neither Agree nor Disagree | Somewhat Disagree  | Strongly Disagree        |
| The lack of certain foods in your grocery store or access to medications is a problem.                                        | Strongly Agree   | Somewhat Agree       | Neither Agree nor Disagree | Somewhat Disagree  | Strongly Disagree        |
| I would prefer to take <b>ONLY</b> a medicine everyday <b>instead of</b> follow a special diet or lifestyle for my heartburn. | Strongly Agree   | Somewhat Agree       | Neither Agree nor Disagree | Somewhat Disagree  | Strongly Disagree        |
| Have you been bothered by symptoms of your heartburn during the past 4 weeks?                                                 | None of the time | A little of the time | Some of the time           | Most of the time   | All of the time          |
| Related to Heartburn, how is your health?                                                                                     | Excellent        | Good                 | Fair                       | Poor               | Terrible                 |
| Overall, how is your health?                                                                                                  | Excellent        | Good                 | Fair                       | Poor               | Terrible                 |
| How much physical pain have you had during the past 4 weeks?                                                                  | None             | A Little             | Some                       | A Good Deal        | Very Much                |
| I am comfortable                                                                                                              | Strongly Agree   | Somewhat Agree       | Neither Agree nor Disagree | Somewhat Disagree  | Strongly Disagree        |
| I am as healthy as anybody I know                                                                                             | Strongly Agree   | Somewhat Agree       | Neither Agree nor Disagree | Somewhat Disagree  | Strongly Disagree        |

To help people say how good or bad a health state is, we have drawn a scale (like a thermometer) on which the best state you can imagine is marked 100 and the worst state you can imagine is marked 0. Indicate on this scale how good or bad your own health is today by placing an "X" next to how you would score your overall health.

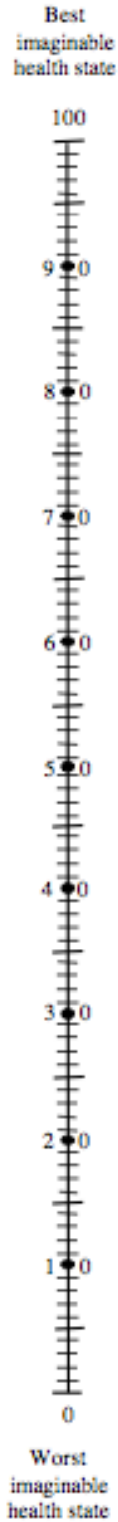

Please use the figure of a thermometer below for this next question. Now rate your health in relation to your heartburn. The best state you can imagine is marked 100 and the worst state you can imagine is marked 0. Indicate on this scale how good or bad your own health is today by placing an "X" next to how you would score your health in relation to your heartburn.

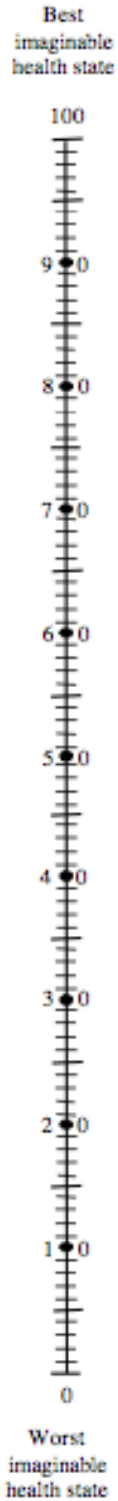

Please use the figure of a thermometer below for this next question. A score of 100 represents VERY DIFFICULT, a score of 0 represents VERY EASY . Please place an “X” next to how hard you think it is to follow your Heartburn treatment.

Very Difficult

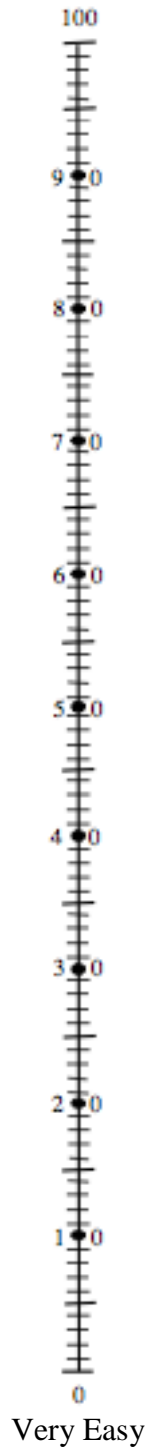

Please use the figure of a thermometer below for this next question. A score of 100 represents VERY IMPORTANT, a score of 0 represents NOT IMPORTANT AT ALL. Please place an "X" next to how important it is to your health to follow your Heartburn treatment.

Very Important

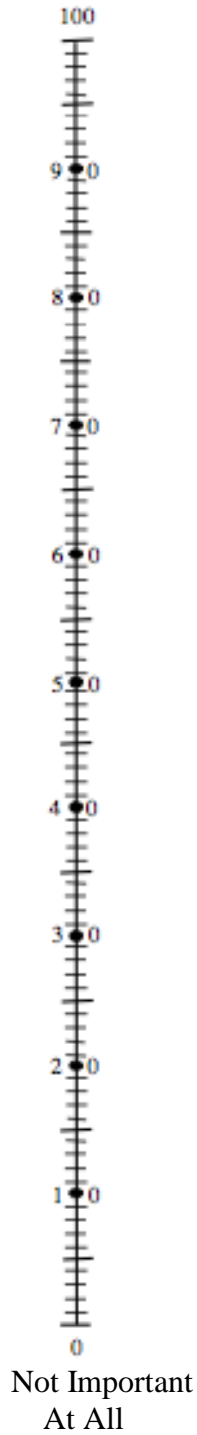

### III. IBD DATA COLLECTION SHEET

**You have been selected for this study because you have been diagnosed with Inflammatory Bowel Disease, which is a general term meaning you have Crohn's Disease or Ulcerative Colitis. Please answer the questions below with regard to your Crohn's Disease or Ulcerative Colitis.**

**Age:** \_\_\_\_\_ **Zip Code:** \_\_\_\_\_ **Gender:** Male Female

**Race:**

- (1) American Indian or Alaska Native (2) Asian  
 (3) Black or African American (4) Native Hawaiian or Other Pacific Islander  
 (5) Caucasian (6) More than one race (Please list): \_\_\_\_\_

**Ethnicity:**

- (1) Hispanic or Latino(a) (2) Not Hispanic or Latino(a)

**Marital status:**

- (1) Single (2) Married (3) Divorced (4) Separated

**Educational Level:**

- (1) Completed Grade School (K-8) (2) Completed Some High School (No diploma)  
 (3) High School Graduate (4) Some College (No degree)  
 (5) Associate degree (6) Trade School  
 (7) Bachelor's degree (8) Master's degree  
 (9) Professional degree (10) Doctorate degree

**Are you currently employed?** (1) Full-time (2) Part-time (3) Unemployed

**Occupation:** \_\_\_\_\_

**What is your household annual income:**

<\$25,000 \$25,001-50,000 \$50,001-75,001 \$75,001-100,000 \$100,000-200,000 >\$200,000

**At what age were you diagnosed with Crohn's Disease or Ulcerative Colitis?** \_\_\_\_\_

**What symptoms if any did you or do you experience related to Crohn's Disease or Ulcerative Colitis?**

\_\_\_\_\_

**At what age did the signs and symptoms of Crohn's Disease or Ulcerative Colitis (if any signs and symptoms were experienced) first appear?**

\_\_\_\_\_

**What was the approximate length of time between presentation of symptoms (if any) and when you sought medical advice?**

\_\_\_\_\_

**How long have you been receiving treatment for Crohn's Disease or Ulcerative Colitis (in years and/or months)?**

\_\_\_\_\_



**What is your health insurance?**

MassHealth          Private          Medicare or Medicaid          None

**How many times have you seen your family doctor in the past year?**

0    1    2    3    4     $\geq 5$

**How many times have you visited a gastroenterologist in the past year?**

0    1    2    3    4     $\geq 5$

**How many times have you been hospitalized in the past year?**

0    1    2    3     $\geq 4$

**In the past five years?**

0    1    2    3     $\geq 4$

**What is the treatment for your Crohn's Disease or Ulcerative Colitis? (Circle all that apply)**

- (1) Sulfa or 5-ASA Drugs like Mesalamine (Asacol), Sulfasalazine
- (2) Antibiotics like Flagyl (Metronidazole) Ciprofloxacin, Clarithromycin, Rifaximin
- (3) 6-Mercaptopurine (6-MP)
- (4) Imuran (Azathioprine)
- (5) Cyclosporine
- (6) Biologics like Infliximab (Remicade) or Adalimumab (Humira)
- (7) Methotrexate
- (8) Surgery
- (8) Steroids like Prednisone, Budesonide (Entocort), Cortifoam, Hydrocortisone
- (9) Lifestyle changes (dietary changes, smoking cessation, avoiding certain triggers, etc)
- (10) Other \_\_\_\_\_

**What factors make treatment for your disease easier or harder? (Circle all that apply.)**

- (1) Understanding and support from family and friends
- (2) Attending my support group
- (3) Seeing my physician regularly
- (4) Knowing enough about my disease
- (5) Cost of medicines
- (6) Taking too many medicines
- (7) Medication side effects
- (8) Other \_\_\_\_\_

| Question                                                                                                                                           | 1                | 2                    | 3                          | 4                  | 5                        |
|----------------------------------------------------------------------------------------------------------------------------------------------------|------------------|----------------------|----------------------------|--------------------|--------------------------|
| I am able to follow my medication schedule and lifestyle changes when outside my home                                                              | Strongly Agree   | Somewhat Agree       | Neither Agree nor Disagree | Somewhat Disagree  | Strongly Disagree        |
| Before I do something I carefully consider the consequences                                                                                        | Strongly Agree   | Somewhat Agree       | Neither Agree nor Disagree | Somewhat Disagree  | Strongly Disagree        |
| I do not consider myself a failure                                                                                                                 | Strongly Agree   | Somewhat Agree       | Neither Agree nor Disagree | Somewhat Disagree  | Strongly Disagree        |
| How important to your health are mistakes in your Crohn's or Ulcerative Colitis treatment?                                                         | Very Important   | Somewhat Important   | Neutral/ Unsure            | A Little Important | Not at All Important     |
| Over the past four weeks how many times have you not followed your diet or lifestyle changes related to Crohn's Disease or Ulcerative Colitis?     | 0 (never)        | 1-2 Times            | 3-5 Times                  | 6-10 times         | More than 10 Times       |
| Over the past four weeks how many times have you missed your Crohn's Disease or Ulcerative Colitis medications?                                    | 0 (never)        | 1-2 Times            | 3-5 Times                  | 6 or more Times    | I don't take medications |
| Cost makes it more difficult to follow your treatment.                                                                                             | Strongly Agree   | Somewhat Agree       | Neither Agree nor Disagree | Somewhat Disagree  | Strongly Disagree        |
| The lack of access to medications is a problem.                                                                                                    | Strongly Agree   | Somewhat Agree       | Neither Agree nor Disagree | Somewhat Disagree  | Strongly Disagree        |
| I would prefer to take ONLY a medicine everyday <b>instead of</b> follow a special diet or lifestyle for my Crohn's Disease or Ulcerative Colitis. | Strongly Agree   | Somewhat Agree       | Neither Agree nor Disagree | Somewhat Disagree  | Strongly Disagree        |
| Have you been bothered by symptoms of your Crohn's Disease or Ulcerative Colitis during the past 4 weeks?                                          | None of the time | A little of the time | Some of the time           | Most of the time   | All of the time          |
| Related to Crohn's or Ulcerative Colitis, how is your health?                                                                                      | Excellent        | Good                 | Fair                       | Poor               | Terrible                 |
| Overall, how is your health?                                                                                                                       | Excellent        | Good                 | Fair                       | Poor               | Terrible                 |
| How much physical pain have you had during the past 4 weeks?                                                                                       | None             | A Little             | Some                       | A Good Deal        | Very Much                |
| I am comfortable                                                                                                                                   | Strongly Agree   | Somewhat Agree       | Neither Agree nor Disagree | Somewhat Disagree  | Strongly Disagree        |
| I am as healthy as anybody I know                                                                                                                  | Strongly Agree   | Somewhat Agree       | Neither Agree nor Disagree | Somewhat Disagree  | Strongly Disagree        |

To help people say how good or bad a health state is, we have drawn a scale (like a thermometer) on which the best state you can imagine is marked 100 and the worst state you can imagine is marked 0. Indicate on this scale how good or bad your own health is today by placing an “X” next to how you would score your overall health.



Please use the figure of a thermometer below for this next question. Now rate your health in relation to your Crohn’s Disease or Ulcerative Colitis. The best state you can imagine is marked 100 and the worst state you can imagine is marked 0. Indicate on this scale how good or bad your own health is today by placing an “X” next to how you would score your health in relation to your Crohn’s Disease or Ulcerative Colitis.

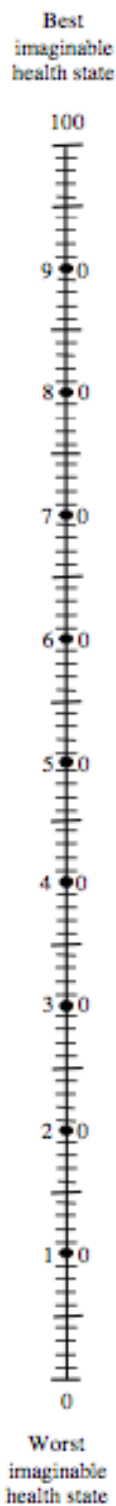

Please use the figure of a thermometer below for this next question. A score of 100 represents VERY DIFFICULT, a score of 0 represents VERY EASY . Please place an "X" next to how hard you think it is to follow your Crohn's Disease or Ulcerative Colitis treatment.

Very Difficult

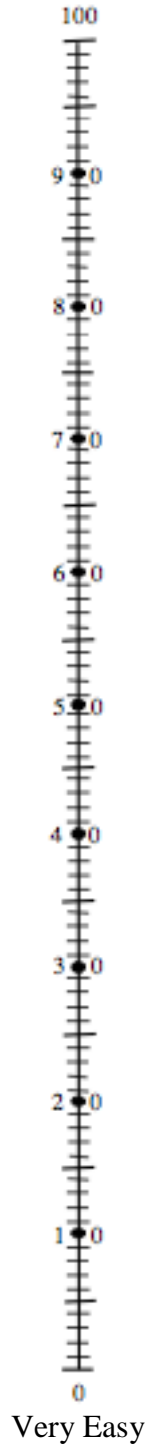

Please use the figure of a thermometer below for this next question. A score of 100 represents VERY IMPORTANT, a score of 0 represents NOT IMPORTANT AT ALL. Please place an "X" next to how important it is to your health to follow your Crohn's Disease or Ulcerative Colitis treatment.

Very Important

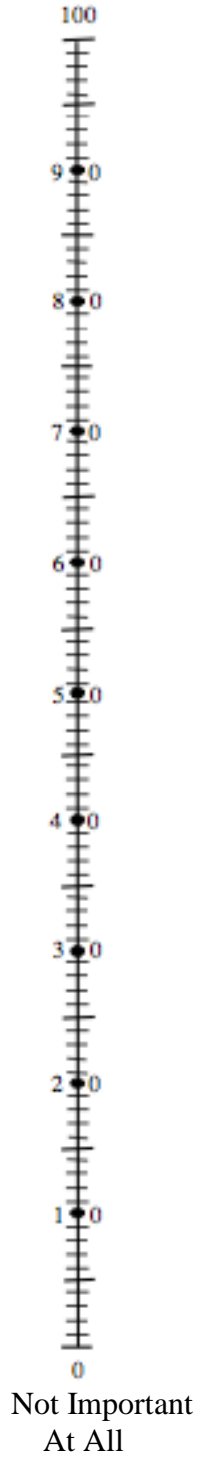

#### IV. IRRITABLE BOWEL SYNDROME DATA COLLECTION SHEET

You have been selected for this study because you have been diagnosed with Irritable Bowel Syndrome. Please answer the questions below with regard to your Irritable Bowel Syndrome.

Age: \_\_\_\_\_ Zip Code: \_\_\_\_\_ Gender: Male Female

**Race:**

- (1) American Indian or Alaska Native (2) Asian  
 (3) Black or African American (4) Native Hawaiian or Other Pacific Islander  
 (5) Caucasian (6) More than one race (Please list): \_\_\_\_\_

**Ethnicity:**

- (1) Hispanic or Latino(a) (2) Not Hispanic or Latino(a)

**Marital status:**

- (1) Single (2) Married (3) Divorced (4) Separated

**Educational Level:**

- (1) Completed Grade School (K-8) (2) Completed Some High School (No diploma)  
 (3) High School Graduate (4) Some College (No degree)  
 (5) Associate degree (6) Trade School  
 (7) Bachelor's degree (8) Master's degree  
 (9) Professional degree (10) Doctorate degree

**Are you currently employed?** (1) Full-time (2) Part-time (3) Unemployed

**Occupation:** \_\_\_\_\_

**What is your household annual income:**

<\$25,000 \$25,001-50,000 \$50,001-75,001 \$75,001-100,000 \$100,000-200,000 >\$200,000

**At what age were you diagnosed with Irritable Bowel Syndrome?** \_\_\_\_\_

**What symptoms did you or do you experience related to Irritable Bowel Syndrome?**

\_\_\_\_\_

**At what age did the signs and symptoms of Irritable Bowel Syndrome first appear?**

\_\_\_\_\_

**What was the approximate length of time between presentation of symptoms and when you sought medical advice?**

\_\_\_\_\_

**How long have you been receiving treatment for Irritable Bowel Syndrome (in years and/or months)?**

\_\_\_\_\_

**What is your health insurance?**

MassHealth      Private      Medicare or Medicaid      None

**How many times have you seen your family doctor in the past year?**

0   1   2   3   4    $\geq 5$

**How many times have you visited a gastroenterologist in the past year?**

0   1   2   3   4    $\geq 5$

**How many times have you been hospitalized in the past year?**

0   1   2   3    $\geq 4$

**In the past five years?**

0   1   2   3    $\geq 4$

**Do you belong to a support group for Irritable Bowel Syndrome?**

YES                      NO

**How is your Irritable Bowel Syndrome treated? (Circle all that apply)**

- (1) Diet changes
- (2) Medications (Please specify \_\_\_\_\_)
- (3) Counseling from a therapist or psychologist
- (4) Other \_\_\_\_\_
- (5) I am not undergoing any treatment for my Irritable Bowel Syndrome

**What factors make treatment for Irritable Bowel Syndrome easier or harder? (Circle all that apply.)**

- (1) Dietary restrictions
- (2) Understanding and support from family and friends
- (3) Attending my support group
- (4) Seeing my physician regularly
- (5) Seeing a therapist/psychologist
- (6) Knowing enough about my disease
- (7) Cost of special foods and/or medications
- (9) Taking too many medicines
- (10) Medication side effects
- (11) Other \_\_\_\_\_



| Question                                                                                                                                                | 1                | 2                    | 3                          | 4                  | 5                                             |
|---------------------------------------------------------------------------------------------------------------------------------------------------------|------------------|----------------------|----------------------------|--------------------|-----------------------------------------------|
| I am able to follow my lifestyle modifications as a person with Irritable Bowel Syndrome while outside my home                                          | Strongly Agree   | Somewhat Agree       | Neither Agree nor Disagree | Somewhat Disagree  | Strongly Disagree                             |
| Before I do something I carefully consider the consequences                                                                                             | Strongly Agree   | Somewhat Agree       | Neither Agree nor Disagree | Somewhat Disagree  | Strongly Disagree                             |
| I do not consider myself a failure                                                                                                                      | Strongly Agree   | Somewhat Agree       | Neither Agree nor Disagree | Somewhat Disagree  | Strongly Disagree                             |
| How important to your health are mistakes in your Irritable Bowel Syndrome lifestyle?                                                                   | Very Important   | Somewhat Important   | Neutral/ Unsure            | A Little Important | Not at All Important                          |
| Over the past four weeks how many times have you made mistakes in your lifestyle modifications for Irritable Bowel Syndrome?                            | 0 (never)        | 1-2 Times            | 3-5 Times                  | 6-10 times         | More than 10 Times                            |
| Over the past four weeks how many times have you missed your counseling or medications?                                                                 | 0 (never)        | 1-2 Times            | 3-5 Times                  | 6 or more Times    | I don't take medications or attend counseling |
| Cost makes it more difficult to follow your treatment.                                                                                                  | Strongly Agree   | Somewhat Agree       | Neither Agree nor Disagree | Somewhat Disagree  | Strongly Disagree                             |
| A lack of special foods in your grocery store, access to counseling, or access to medications is a problem for your Irritable Bowel Syndrome lifestyle. | Strongly Agree   | Somewhat Agree       | Neither Agree nor Disagree | Somewhat Disagree  | Strongly Disagree                             |
| I would prefer to take a single medicine everyday <b>instead of</b> my current lifestyle changes for irritable bowel syndrome.                          | Strongly Agree   | Somewhat Agree       | Neither Agree nor Disagree | Somewhat Disagree  | Strongly Disagree                             |
| Have you been bothered by symptoms of your irritable bowel syndrome during the past 4 weeks?                                                            | None of the time | A little of the time | Some of the time           | Most of the time   | All of the time                               |
| Related to Irritable Bowel Syndrome, how is your health?                                                                                                | Excellent        | Good                 | Fair                       | Poor               | Terrible                                      |
| Overall, how is your health?                                                                                                                            | Excellent        | Good                 | Fair                       | Poor               | Terrible                                      |
| How much physical pain have you had during the past 4 weeks?                                                                                            | None             | A Little             | Some                       | A Good Deal        | Very Much                                     |
| I am comfortable                                                                                                                                        | Strongly Agree   | Somewhat Agree       | Neither Agree nor Disagree | Somewhat Disagree  | Strongly Disagree                             |
| I am as healthy as anybody I know                                                                                                                       | Strongly Agree   | Somewhat Agree       | Neither Agree nor Disagree | Somewhat Disagree  | Strongly Disagree                             |

To help people say how good or bad a health state is, we have drawn a scale (like a thermometer) on which the best state you can imagine is marked 100 and the worst state you can imagine is marked 0. Indicate on this scale how good or bad your own health is today by placing an “X” next to how you would score your overall health.



Please use the figure of a thermometer below for this next question. Now rate your health in relation to your irritable bowel syndrome. The best state you can imagine is marked 100 and the worst state you can imagine is marked 0. Indicate on this scale how good or bad your own health is today by placing an “X” next to how you would score your health in relation to your irritable bowel syndrome.

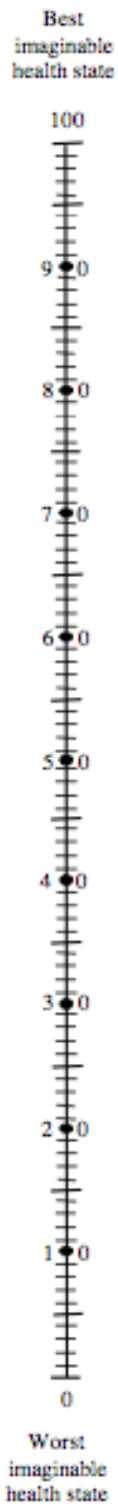

Please use the figure of a thermometer below for this next question. A score of 100 represents VERY DIFFICULT, a score of 0 represents VERY EASY . Please place an "X" next to how hard you think it is to follow your Irritable Bowel Syndrome treatment.

Very Difficult

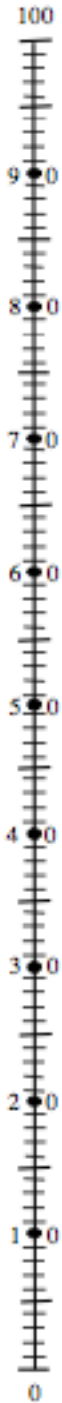

Very Easy

Please use the figure of a thermometer below for this next question. A score of 100 represents VERY IMPORTANT, a score of 0 represents NOT IMPORTANT AT ALL. Please place an "X" next to how important it is to your health to follow your Irritable Bowel Syndrome treatment.

Very Important

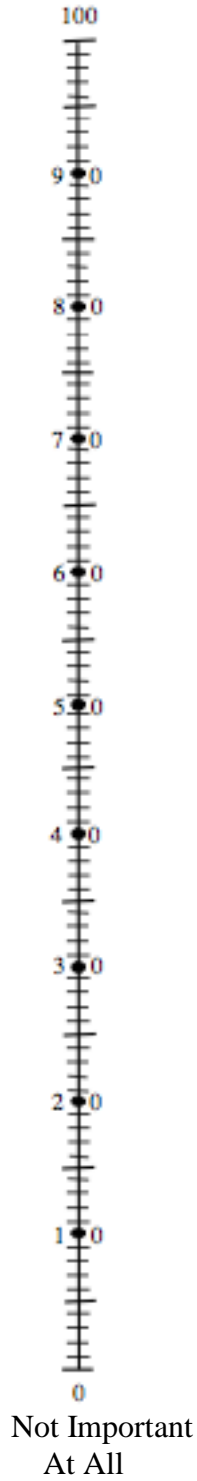

**V. HYPERTENSION DATA COLLECTION SHEET**

**You have been selected for this study because you have been diagnosed with Hypertension (High blood pressure). Please answer the questions below with regard to your high blood pressure.**

**Age:** \_\_\_\_\_ **Zip Code:** \_\_\_\_\_ **Gender:** Male Female

**Race:**

- (1) American Indian or Alaska Native (2) Asian  
 (3) Black or African American (4) Native Hawaiian or Other Pacific Islander  
 (5) Caucasian (6) More than one race (Please list): \_\_\_\_\_

**Ethnicity:**

- (1) Hispanic or Latino(a) (2) Not Hispanic or Latino(a)

**Marital status:**

- (1) Single (2) Married (3) Divorced (4) Separated

**Educational Level:**

- (1) Completed Grade School (K-8) (2) Completed Some High School (No diploma)  
 (3) High School Graduate (4) Some College (No degree)  
 (5) Associate degree (6) Trade School  
 (7) Bachelor's degree (8) Master's degree  
 (9) Professional degree (10) Doctorate degree

**Are you currently employed?** (1) Full-time (2) Part-time (3) Unemployed

**Occupation:** \_\_\_\_\_

**What is your household annual income:**

<\$25,000 \$25,001-50,000 \$50,001-75,001 \$75,001-100,000 \$100,000-200,000 >\$200,000

**At what age were you diagnosed with Hypertension (high blood pressure)?** \_\_\_\_\_

**What symptoms if any did you or do you experience related to Hypertension?**

\_\_\_\_\_

**At what age did the signs and symptoms of Hypertension (if any signs and symptoms were experienced) first appear?**

\_\_\_\_\_

**What was the approximate length of time between presentation of symptoms (if any) and when you sought medical advice?**

\_\_\_\_\_

**How long have you been receiving treatment for Hypertension (in years and/or months)?**

\_\_\_\_\_

**What is your health insurance?**

MassHealth      Private      Medicare or Medicaid      None

**How many times have you seen your family doctor in the past year?**

0   1   2   3   4    $\geq 5$

**How many times have you visited a specialist for your Hypertension (like a kidney doctor) in the past year?**

0   1   2   3   4    $\geq 5$

**How many times have you been hospitalized in the past year?**

0   1   2   3    $\geq 4$

**In the past five years?**

0   1   2   3    $\geq 4$

**How is your Hypertension treated? (Please circle all that apply.)**

- (1) One medicine (Please list \_\_\_\_\_)
- (2) Two medicines (Please list \_\_\_\_\_)
- (3) More than two medicines (Please list \_\_\_\_\_)
- (4) Changes in my lifestyle (for example, exercise, low salt diet, weight loss)
- (5) Other \_\_\_\_\_

**What makes treatment for your Hypertension easier or harder? (Circle all that apply.)**

- (1) Cost of medicines and lifestyle changes
- (2) Difficulty when eating out
- (3) Understanding and support from family and friends
- (4) Medication side effects
- (5) Seeing my physician regularly
- (6) How available healthy foods are in my local grocery store
- (7) Taking too many medications
- (8) Knowing enough about how to treat High blood pressure
- (9) Other \_\_\_\_\_

| Question                                                                 | 1              | 2              | 3                          | 4                 | 5                 |
|--------------------------------------------------------------------------|----------------|----------------|----------------------------|-------------------|-------------------|
| I am able to follow my medication schedule and diet when outside my home | Strongly Agree | Somewhat Agree | Neither Agree nor Disagree | Somewhat Disagree | Strongly Disagree |
| Before I do something I carefully consider the consequences              | Strongly Agree | Somewhat Agree | Neither Agree nor Disagree | Somewhat Disagree | Strongly Disagree |
| I do not consider myself a failure                                       | Strongly Agree | Somewhat Agree | Neither Agree nor Disagree | Somewhat Disagree | Strongly Disagree |
| How important to your health are                                         | Very           | Somewhat       | Neutral/                   | A Little          | Not at All        |

|                                                                                                               |                  |                      |                            |                   |                          |
|---------------------------------------------------------------------------------------------------------------|------------------|----------------------|----------------------------|-------------------|--------------------------|
| mistakes in your treatment for hypertension?                                                                  | Important        | Important            | Unsure                     | Important         | Important                |
| Over the past four weeks how many times have you made mistakes in your diet or lifestyle ?                    | 0 (never)        | 1-2 Times            | 3-5 Times                  | 6-10 Times        | More than 10 Times       |
| Over the past four weeks how many times have you missed your medications for hypertension?                    | 0 (never)        | 1-2 Times            | 3-5 Times                  | 6 or more Times   | I don't take medications |
| Cost makes it more difficult to follow your treatment.                                                        | Strongly Agree   | Somewhat Agree       | Neither Agree nor Disagree | Somewhat Disagree | Strongly Disagree        |
| The lack of low-salt foods in your grocery store or access to medications is a problem.                       | Strongly Agree   | Somewhat Agree       | Neither Agree nor Disagree | Somewhat Disagree | Strongly Disagree        |
| I would prefer to take a medicine everyday <b>instead of</b> follow lifestyle changes like diet and exercise. | Strongly Agree   | Somewhat Agree       | Neither Agree nor Disagree | Somewhat Disagree | Strongly Disagree        |
| Have you been bothered by symptoms of your hypertension during the past 4 weeks?                              | None of the time | A little of the time | Some of the time           | Most of the time  | All of the time          |
| Related to hypertension, how is your health?                                                                  | Excellent        | Good                 | Fair                       | Poor              | Terrible                 |
| Overall, how is your health?                                                                                  | Excellent        | Good                 | Fair                       | Poor              | Terrible                 |
| How much physical pain have you had during the past 4 weeks?                                                  | None             | A Little             | Some                       | A Good Deal       | Very Much                |
| I am comfortable                                                                                              | Strongly Agree   | Somewhat Agree       | Neither Agree nor Disagree | Somewhat Disagree | Strongly Disagree        |
| I am as healthy as anybody I know                                                                             | Strongly Agree   | Somewhat Agree       | Neither Agree nor Disagree | Somewhat Disagree | Strongly Disagree        |



To help people say how good or bad a health state is, we have drawn a scale (like a thermometer) on which the best state you can imagine is marked 100 and the worst state you can imagine is marked 0. Indicate on this scale how good or bad your own health is today by placing an “X” next to how you would score your overall health.



Please use the figure of a thermometer below for this next question. Now rate your health in relation to your hypertension. The best state you can imagine is marked 100 and the worst state you can imagine is marked 0. Indicate on this scale how good or bad your own health is today by placing an "X" next to how you would score your health in relation to your hypertension.

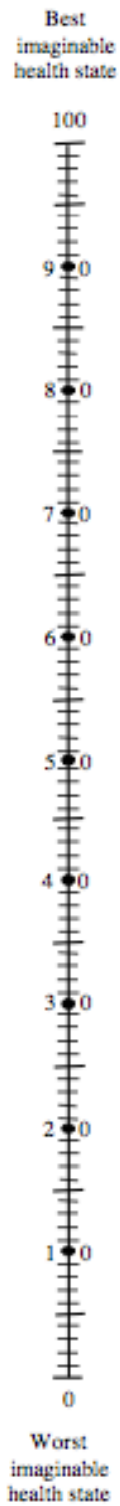

Please use the figure of a thermometer below for this next question. A score of 100 represents VERY DIFFICULT, a score of 0 represents VERY EASY . Please place an “X” next to how hard you think it is to follow your Hypertension treatment.

Very Difficult

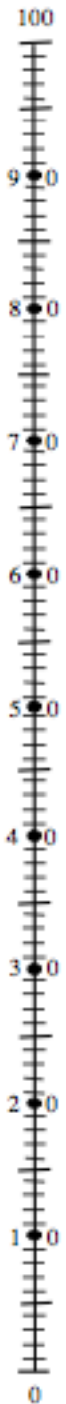

Very Easy

Please use the figure of a thermometer below for this next question. A score of 100 represents VERY IMPORTANT, a score of 0 represents NOT IMPORTANT AT ALL. Please place an "X" next to how important it is to your health to follow your Hypertension treatment.

Very Important

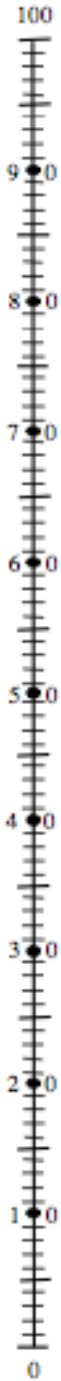

Not Important  
At All

**VI. END STAGE RENAL DISEASE DATA COLLECTION SHEET**

**You have been selected for this study because you have been diagnosed with End-Stage Renal Disease (Kidney Failure) that requires Dialysis. Please answer the questions below with regard to your End Stage Kidney Failure.**

**Age:** \_\_\_\_\_ **Zip Code:** \_\_\_\_\_ **Gender:** Male Female

**Race:**

- (1) American Indian or Alaska Native (2) Asian  
 (3) Black or African American (4) Native Hawaiian or Other Pacific Islander  
 (5) Caucasian (6) More than one race (Please list): \_\_\_\_\_

**Ethnicity:**

- (1) Hispanic or Latino(a) (2) Not Hispanic or Latino(a)

**Marital status:**

- (1) Single (2) Married (3) Divorced (4) Separated

**Educational Level:**

- (1) Completed Grade School (K-8) (2) Completed Some High School (No diploma)  
 (3) High School Graduate (4) Some College (No degree)  
 (5) Associate degree (6) Trade School  
 (7) Bachelor's degree (8) Master's degree  
 (9) Professional degree (10) Doctorate degree

**Are you currently employed?** (1) Full-time (2) Part-time (3) Unemployed

**Occupation:** \_\_\_\_\_

**What is your household annual income:**

<\$25,000 \$25,001-50,000 \$50,001-75,001 \$75,001-100,000 \$100,000-200,000 >\$200,000

**At what age were you diagnosed with End-Stage Kidney Failure?** \_\_\_\_\_

**What symptoms if any did you or do you experience related to End-Stage Kidney Failure?**

\_\_\_\_\_

**At what age did the signs and symptoms of End-Stage Kidney Failure (if any signs and symptoms were experienced) first appear?**

\_\_\_\_\_

**What was the approximate length of time between presentation of symptoms (if any) and when you sought medical advice?**

\_\_\_\_\_

**How long have you been receiving treatment for End-Stage Kidney Failure (in years and/or months)?**

\_\_\_\_\_

**What is your health insurance?**

MassHealth      Private      Medicare or Medicaid      None

**How many times have you seen your family doctor in the past year?**

0   1   2   3   4    $\geq 5$

**How many times have you visited a kidney doctor in the past year?**

0   1   2   3   4    $\geq 5$

**How many times have you been hospitalized in the past year?**

0   1   2   3    $\geq 4$

**In the past five years?**

0   1   2   3    $\geq 4$

**What is the treatment for your Kidney Disease? (Please circle all that apply.)**

- (1) Dialysis
- (2) A low protein, kidney healthy diet
- (3) One medication (Please list) \_\_\_\_\_
- (4) Two medications (Please list) \_\_\_\_\_
- (5) More than two medications (Please list) \_\_\_\_\_
- (6) Other \_\_\_\_\_

**What factors make treatment for End-Stage Renal Disease easier or harder? (Circle all that apply.)**

- (1) Cost of food, medicines, and/or going to dialysis
- (2) Difficulty when eating out
- (3) Understanding and support from family and friends
- (4) Seeing my physician regularly
- (5) How available low protein, kidney healthy options are in my local grocery store
- (6) Taking too many medications
- (7) Knowing enough about what it means to have End Stage Renal Disease
- (8) Other dietary restrictions
- (9) Medication side effects
- (10) Difficulty in going to dialysis
- (11) Discomfort from having to go to dialysis
- (13) Other \_\_\_\_\_

| Question                                                                                                                                | 1                | 2                    | 3                          | 4                  | 5                        |
|-----------------------------------------------------------------------------------------------------------------------------------------|------------------|----------------------|----------------------------|--------------------|--------------------------|
| I am able to follow my medication schedule, dialysis schedule, and diet when outside my home                                            | Strongly Agree   | Somewhat Agree       | Neither Agree nor Disagree | Somewhat Disagree  | Strongly Disagree        |
| Before I do something I carefully consider the consequences                                                                             | Strongly Agree   | Somewhat Agree       | Neither Agree nor Disagree | Somewhat Disagree  | Strongly Disagree        |
| I do not consider myself a failure                                                                                                      | Strongly Agree   | Somewhat Agree       | Neither Agree nor Disagree | Somewhat Disagree  | Strongly Disagree        |
| How important to your health are mistakes in treatment for your kidney failure?                                                         | Very Important   | Somewhat Important   | Neutral/ Unsure            | A Little Important | Not at All Important     |
| Over the past four weeks how many times have you eaten non-kidney healthy foods on purpose?                                             | 0 (never)        | 1-2 Times            | 3-5 Times                  | 6-10 Times         | More than 10 Times       |
| Over the past four weeks how many times have you missed your medications for kidney failure?                                            | 0 (never)        | 1-2 Times            | 3-5 Times                  | 6 or more Times    | I don't take medications |
| Over the past four weeks how many times have you missed your dialysis?                                                                  | 0 (never)        | 1-2 Times            | 3-5 Times                  | 6 or more Times    | I am not on dialysis     |
| Cost makes it more difficult to follow your treatment.                                                                                  | Strongly Agree   | Somewhat Agree       | Neither Agree nor Disagree | Somewhat Disagree  | Strongly Disagree        |
| The lack of low-protein, kidney healthy foods in your grocery store, access to dialysis centers, or access to medications is a problem. | Strongly Agree   | Somewhat Agree       | Neither Agree nor Disagree | Somewhat Disagree  | Strongly Disagree        |
| I would prefer to take an extra medicine everyday <b>instead of</b> dialysis.                                                           | Strongly Agree   | Somewhat Agree       | Neither Agree nor Disagree | Somewhat Disagree  | Strongly Disagree        |
| I would prefer to <b>ONLY</b> take a medicine everyday <b>instead of</b> follow a kidney healthy diet.                                  | Strongly Agree   | Somewhat Agree       | Neither Agree nor Disagree | Somewhat Disagree  | Strongly Disagree        |
| Have you been bothered by symptoms of your kidney failure during the past 4 weeks?                                                      | None of the time | A little of the time | Some of the time           | Most of the time   | All of the time          |
| Related to your kidney failure, how is your health?                                                                                     | Excellent        | Good                 | Fair                       | Poor               | Terrible                 |
| Overall, how is your health?                                                                                                            | Excellent        | Good                 | Fair                       | Poor               | Terrible                 |
| How much physical pain have you had during the past 4 weeks?                                                                            | None             | A Little             | Some                       | A Good Deal        | Very Much                |
| I am comfortable                                                                                                                        | Strongly Agree   | Somewhat Agree       | Neither Agree nor Disagree | Somewhat Disagree  | Strongly Disagree        |
| I am as healthy as anybody I know                                                                                                       | Strongly Agree   | Somewhat Agree       | Neither Agree nor Disagree | Somewhat Disagree  | Strongly Disagree        |

To help people say how good or bad a health state is, we have drawn a scale (like a thermometer) on which the best state you can imagine is marked 100 and the worst state you can imagine is marked 0. Indicate on this scale how good or bad your own health is today by placing an "X" next to how you would score your overall health.

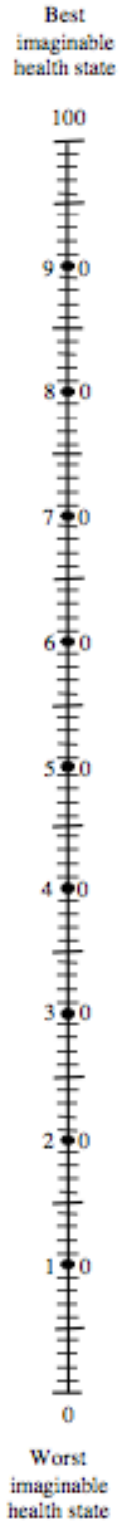



Please use the figure of a thermometer below for this next question. Now rate your health in relation to your kidney failure. The best state you can imagine is marked 100 and the worst state you can imagine is marked 0. Indicate on this scale how good or bad your own health is today by placing an "X" next to how you would score your health in relation to your kidney failure.

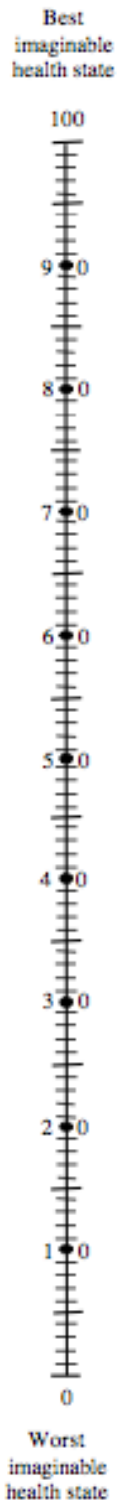

Please use the figure of a thermometer below for this next question. A score of 100 represents VERY DIFFICULT, a score of 0 represents VERY EASY . Please place an “X” next to how hard you think it is to follow your Kidney Disease treatment (Dialysis).

Very Difficult

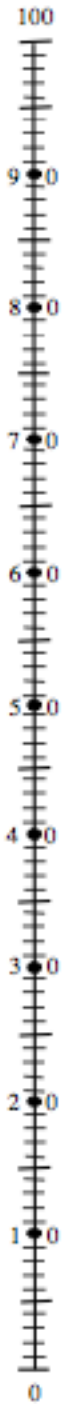

Very Easy

Please use the figure of a thermometer below for this next question. A score of 100 represents VERY IMPORTANT, a score of 0 represents NOT IMPORTANT AT ALL. Please place an "X" next to how important it is to your health to follow your Kidney Disease treatment (dialysis).

Very Important

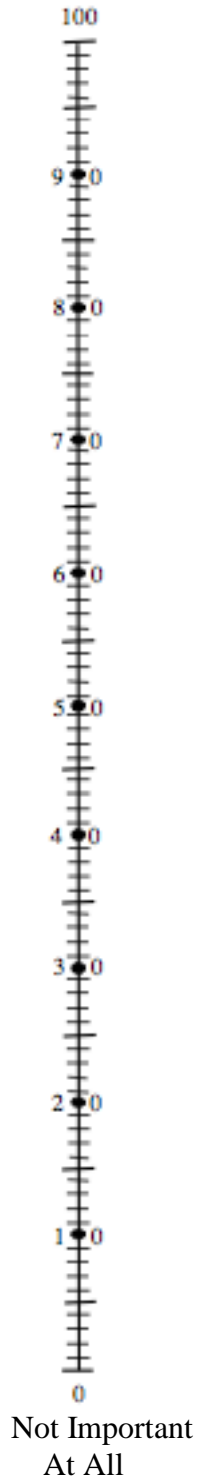

**VII. DIABETES MELLITUS DATA COLLECTION SHEET**

**You have been selected for this study because you have been diagnosed with Diabetes, which means that you have high blood sugars. Please answer the questions below with regard to your Diabetes.**

**Age:** \_\_\_\_\_ **Zip Code:** \_\_\_\_\_ **Gender:** Male Female

**Race:**

- (1) American Indian or Alaska Native (2) Asian  
 (3) Black or African American (4) Native Hawaiian or Other Pacific Islander  
 (5) Caucasian (6) More than one race (Please list): \_\_\_\_\_

**Ethnicity:**

- (1) Hispanic or Latino(a) (2) Not Hispanic or Latino(a)

**Marital status:**

- (1) Single (2) Married (3) Divorced (4) Separated

**Educational Level:**

- (1) Completed Grade School (K-8) (2) Completed Some High School (No diploma)  
 (3) High School Graduate (4) Some College (No degree)  
 (5) Associate degree (6) Trade School  
 (7) Bachelor's degree (8) Master's degree  
 (9) Professional degree (10) Doctorate degree

**Are you currently employed?** (1) Full-time (2) Part-time (3) Unemployed

**Occupation:** \_\_\_\_\_

**What is your household annual income:**

<\$25,000 \$25,001-50,000 \$50,001-75,001 \$75,001-100,000 \$100,000-200,000 >\$200,000

**At what age were you diagnosed with Diabetes?** \_\_\_\_\_

**What symptoms if any did you or do you experience related to Diabetes?**

\_\_\_\_\_

**At what age did the signs and symptoms of Diabetes (if any signs and symptoms were experienced) first appear?**

\_\_\_\_\_

**What was the approximate length of time between presentation of symptoms (if any) and when you sought medical advice?**

\_\_\_\_\_

**How long have you been receiving treatment for Diabetes (in years and/or months)?**

\_\_\_\_\_

**What is your health insurance?**

MassHealth          Private          Medicare or Medicaid          None

**How many times have you seen your family doctor in the past year?**

0   1   2   3   4    $\geq 5$

**How many times have you visited a diabetes specialist in the past year?**

0   1   2   3   4    $\geq 5$

**How many times have you been hospitalized in the past year?**

0   1   2   3    $\geq 4$

**In the past five years?**

0   1   2   3    $\geq 4$

**What is the treatment for your diabetes? (Circle all that apply.)**

- (1) Sugar-free, diabetic diet
- (2) One to two medications (Please list) \_\_\_\_\_
- (3) Three to five medications (Please list) \_\_\_\_\_
- (4) More than five medications (Please list) \_\_\_\_\_

**What factors make treatment for your diabetes easier or harder? (Circle all that apply.)**

- (1) Cost of food and medicines
- (2) Difficulty when eating out
- (3) Understanding and support from family and friends
- (4) Seeing my physician regularly
- (5) How available sugar-free, diabetic options are in my local grocery store
- (6) Taking too many medications
- (7) Knowing enough about what it means to have a sugar-free, diabetic diet
- (8) Other dietary restrictions
- (9) Medication side effects
- (10) Having to check my blood sugars
- (11) Other \_\_\_\_\_

| Question                                                                 | 1              | 2              | 3                          | 4                 | 5                 |
|--------------------------------------------------------------------------|----------------|----------------|----------------------------|-------------------|-------------------|
| I am able to follow my medication schedule and diet when outside my home | Strongly Agree | Somewhat Agree | Neither Agree nor Disagree | Somewhat Disagree | Strongly Disagree |
| Before I do something I carefully consider the consequences              | Strongly Agree | Somewhat Agree | Neither Agree nor Disagree | Somewhat Disagree | Strongly Disagree |

|                                                                                                     |                  |                      |                            |                    |                          |
|-----------------------------------------------------------------------------------------------------|------------------|----------------------|----------------------------|--------------------|--------------------------|
| I do not consider myself a failure                                                                  | Strongly Agree   | Somewhat Agree       | Neither Agree nor Disagree | Somewhat Disagree  | Strongly Disagree        |
| How important to your health are mistakes in your diabetes treatment?                               | Very Important   | Somewhat Important   | Neutral/ Unsure            | A Little Important | Not at All Important     |
| Over the past four weeks how many times have you eaten non-diabetic foods on purpose?               | 0 (never)        | 1-2 Times            | 3-5 Times                  | 6-10 times         | More than 10 Times       |
| Over the past four weeks how many times have you missed your diabetes medications?                  | 0 (never)        | 1-2 Times            | 3-5 Times                  | 6 or more Times    | I don't take medications |
| Cost makes it more difficult to follow your treatment.                                              | Strongly Agree   | Somewhat Agree       | Neither Agree nor Disagree | Somewhat Disagree  | Strongly Disagree        |
| The lack of sugar-free, diabetic foods in your grocery store or access to medications is a problem. | Strongly Agree   | Somewhat Agree       | Neither Agree nor Disagree | Somewhat Disagree  | Strongly Disagree        |
| I would prefer to take a medicine everyday <b>instead of</b> follow a diabetic diet.                | Strongly Agree   | Somewhat Agree       | Neither Agree nor Disagree | Somewhat Disagree  | Strongly Disagree        |
| Have you been bothered by symptoms of your diabetes during the past 4 weeks?                        | None of the time | A little of the time | Some of the time           | Most of the time   | All of the time          |
| Related to Diabetes, how is your health?                                                            | Excellent        | Good                 | Fair                       | Poor               | Terrible                 |
| Overall, how is your health?                                                                        | Excellent        | Good                 | Fair                       | Poor               | Terrible                 |
| How much physical pain have you had during the past 4 weeks?                                        | None             | A Little             | Some                       | A Good Deal        | Very Much                |
| I am comfortable                                                                                    | Strongly Agree   | Somewhat Agree       | Neither Agree nor Disagree | Somewhat Disagree  | Strongly Disagree        |
| I am as healthy as anybody I know                                                                   | Strongly Agree   | Somewhat Agree       | Neither Agree nor Disagree | Somewhat Disagree  | Strongly Disagree        |

To help people say how good or bad a health state is, we have drawn a scale (like a thermometer) on which the best state you can imagine is marked 100 and the worst state you can imagine is marked 0. Indicate on this scale how good or bad your own health is today by placing an "X" next to how you would score your overall health.



Please use the figure of a thermometer below for this next question. Now rate your health in relation to your diabetes. The best state you can imagine is marked 100 and the worst state you can imagine is marked 0. Indicate on this scale how good or bad your own health is today by placing an "X" next to how you would score your health in relation to your diabetes.

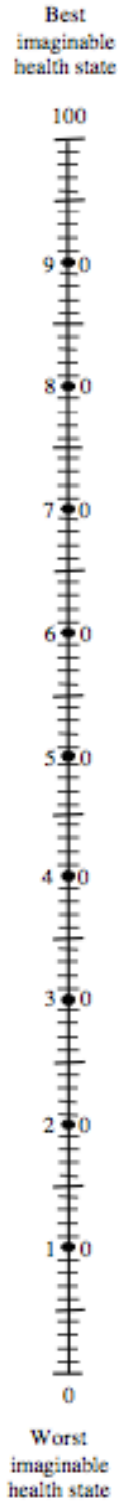



Please use the figure of a thermometer below for this next question. A score of 100 represents VERY DIFFICULT, a score of 0 represents VERY EASY . Please place an "X" next to how hard you think it is to follow your Diabetes treatment.

Very Difficult

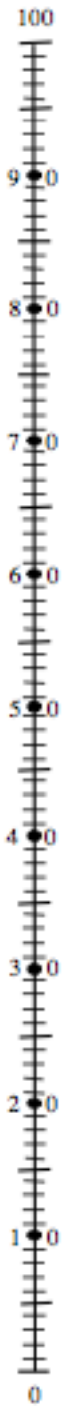

Very Easy

Please use the figure of a thermometer below for this next question. A score of 100 represents VERY IMPORTANT, a score of 0 represents NOT IMPORTANT AT ALL. Please place an "X" next to how important it is to your health to follow your Diabetes treatment.

Very Important

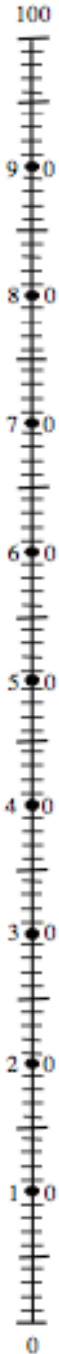

Not Important  
At All

For Peer Review

## VIII. CONGESTIVE HEART FAILURE DATA COLLECTION SHEET

**CHF Data Collection Sheet**

You have been selected for this study because you have been diagnosed with CHF (Congestive Heart Failure), which means that your heart does not pump as well as it should. Please answer the questions below with regard to your Heart Failure.

Age: \_\_\_\_\_ Zip Code: \_\_\_\_\_ Gender: Male Female

Race: Caucasian African American Hispanic Other \_\_\_\_\_

At what age were you diagnosed with Heart Failure? \_\_\_\_\_

What is your household annual income:

\$<25,000 \$25,001-50,000 \$50,001-75,001 \$75,001-100,000 \$>100,000

What is your employment status?

Full-time Part-time Unemployed Disability/Government Support

What is your highest educational level completed:

Less than high school High School GED

Undergraduate college Graduate College/ Higher

What is your health insurance?

MassHealth Private Medicare or Medicaid None

How many times have you seen your family doctor in the past year?

0 1 2 3 4  $\geq 5$

How many times have you visited your cardiologist in the past year?

0 1 2 3 4  $\geq 5$

How many times have you been hospitalized in the past year?

0 1 2 3  $\geq 4$

In the past five years?

0 1 2 3  $\geq 4$

Do you think that a lack of low salt, heart healthy foods in your grocery store is a problem?

(1) (2) (3) (4) (5)  
 All the time Most of the time Sometimes A little of the time None of the time

**What factors make treatment for your heart failure easier or harder? (Circle all that apply.)**

- (1) Cost of food and medicines
- (2) Difficulty when eating out
- (3) Understanding and support from family and friends
- (4) Seeing my physician regularly
- (5) How available low salt, heart healthy options are in my local grocery store
- (6) Taking too many medications
- (7) Knowing enough about what it means to have a low salt, heart healthy diet
- (8) Other dietary restrictions
- (9) Medication side effects
- (10) Other \_\_\_\_\_

**I am able to follow a low salt, heart healthy diet when dining outside my home.**

(1) (2) (3) (4) (5)  
 Strongly agree Somewhat agree Unsure Somewhat disagree Strongly disagree

**Before I do something I carefully consider the consequences.**

(1) (2) (3) (4) (5)  
 Strongly agree Somewhat agree Unsure Somewhat disagree Strongly disagree

**I do not consider myself a failure.**

(1) (2) (3) (4) (5)  
 Strongly agree Somewhat agree Unsure Somewhat disagree Strongly disagree

**I would prefer to take an extra medicine everyday instead of follow a low salt, heart healthy diet.**

(1) (2) (3) (4) (5)  
 Strongly agree Somewhat agree Unsure Somewhat disagree Strongly disagree

**Over the past four weeks, how many times have you made mistakes in your diet and medications as a person with Heart Failure?**

0 times (Never) 1-2 times 3-5 times 6-10 times More than 10 times

**Have you been bothered by symptoms of Heart Failure during the past four weeks?**

(1) (2) (3) (4) (5)  
 All the time Most of the time Sometimes A little of the time None of the time

To help people say how good or bad a health state is, we have drawn a scale (like a thermometer) on which the best state you can imagine is marked 100 and the worst state you can imagine is marked 0. Indicate on this scale how good or bad your own health is today by placing an “X” next to how you would score your overall health.



Please use the figure of a thermometer below for this next question. Now rate your health in relation to your heart failure. The best state you can imagine is marked 100 and the worst state you can imagine is marked 0. Indicate on this scale how good or bad your own health is today by placing an "X" next to how you would score your health in relation to your diabetes.

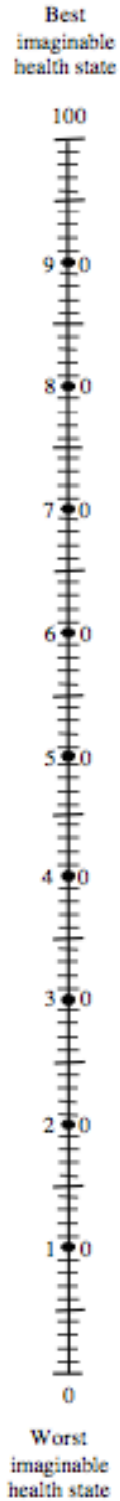

Please use the figure of a thermometer below for this next question. A score of 100 represents VERY DIFFICULT, a score of 0 represents VERY EASY . Please place an "X" next to how hard you think it is to follow your heart failure treatment.

Very Difficult



Very Easy

For Peer Review

Please use the figure of a thermometer below for this next question. A score of 100 represents VERY IMPORTANT, a score of 0 represents NOT IMPORTANT AT ALL. Please place an "X" next to how important it is to your health to follow your heart failure treatment.

Very Important



Not Important  
At All



**Table 1: Baseline demographic and clinical characteristics of celiac disease patients**

| <b>General characteristics</b>         | <b>Respondents<br/>n = 341<br/>(% or SD)</b> | <b>Non-Respondents<br/>n = 432<br/>(% or SD)</b> | <b>Respondents<br/>vs. Non-<br/>Respondents<br/>p</b> |
|----------------------------------------|----------------------------------------------|--------------------------------------------------|-------------------------------------------------------|
| Female                                 | 75.7%                                        | 72.0%                                            | 0.290                                                 |
| Age, years                             | 51.1 (15.0)                                  | 49.1 (16.5)                                      | 0.082                                                 |
| White                                  | 95.6%                                        | 94.5%                                            | 0.511                                                 |
| Age of celiac diagnosis, years         | 43.0 (15.3)                                  | 42.9 (15.6)                                      | 0.929                                                 |
| Months on GFD                          | 85.5 (73.7)                                  | 72.3 (54.8)                                      | 0.044                                                 |
| Gastrointestinal symptoms at diagnosis | 78.6                                         | 66.6%                                            | 0.722                                                 |

Data are numbers (%) or mean (SD). GFD=gluten free diet.

## STROBE Statement—checklist of items that should be included in reports of observational studies

|                              | Item No | Recommendation                                                                                                                                                                                                                                                                                                                                                                                                                                                                                                                                                                                                                                                                                           |
|------------------------------|---------|----------------------------------------------------------------------------------------------------------------------------------------------------------------------------------------------------------------------------------------------------------------------------------------------------------------------------------------------------------------------------------------------------------------------------------------------------------------------------------------------------------------------------------------------------------------------------------------------------------------------------------------------------------------------------------------------------------|
| <b>Title and abstract</b>    | 1       | (a) Indicate the study's design with a commonly used term in the title or the abstract 1, 3<br>(b) Provide in the abstract an informative and balanced summary of what was done and what was found 3                                                                                                                                                                                                                                                                                                                                                                                                                                                                                                     |
| <b>Introduction</b>          |         |                                                                                                                                                                                                                                                                                                                                                                                                                                                                                                                                                                                                                                                                                                          |
| Background/rationale         | 2       | Explain the scientific background and rationale for the investigation being reported 5                                                                                                                                                                                                                                                                                                                                                                                                                                                                                                                                                                                                                   |
| Objectives                   | 3       | State specific objectives, including any prespecified hypotheses 6                                                                                                                                                                                                                                                                                                                                                                                                                                                                                                                                                                                                                                       |
| <b>Methods</b>               |         |                                                                                                                                                                                                                                                                                                                                                                                                                                                                                                                                                                                                                                                                                                          |
| Study design                 | 4       | Present key elements of study design early in the paper 3, 6, 7                                                                                                                                                                                                                                                                                                                                                                                                                                                                                                                                                                                                                                          |
| Setting                      | 5       | Describe the setting, locations, and relevant dates, including periods of recruitment, exposure, follow-up, and data collection 6, 7                                                                                                                                                                                                                                                                                                                                                                                                                                                                                                                                                                     |
| Participants                 | 6       | (a) <i>Cohort study</i> —Give the eligibility criteria, and the sources and methods of selection of participants. Describe methods of follow-up 7<br><i>Case-control study</i> —Give the eligibility criteria, and the sources and methods of case ascertainment and control selection. Give the rationale for the choice of cases and controls 7<br><i>Cross-sectional study</i> —Give the eligibility criteria, and the sources and methods of selection of participants<br>(b) <i>Cohort study</i> —For matched studies, give matching criteria and number of exposed and unexposed 7<br><i>Case-control study</i> —For matched studies, give matching criteria and the number of controls per case 7 |
| Variables                    | 7       | Clearly define all outcomes, exposures, predictors, potential confounders, and effect modifiers. Give diagnostic criteria, if applicable                                                                                                                                                                                                                                                                                                                                                                                                                                                                                                                                                                 |
| Data sources/<br>measurement | 8*      | For each variable of interest, give sources of data and details of methods of assessment (measurement). Describe comparability of assessment methods if there is more than one group 6, 8                                                                                                                                                                                                                                                                                                                                                                                                                                                                                                                |
| Bias                         | 9       | Describe any efforts to address potential sources of bias                                                                                                                                                                                                                                                                                                                                                                                                                                                                                                                                                                                                                                                |
| Study size                   | 10      | Explain how the study size was arrived at                                                                                                                                                                                                                                                                                                                                                                                                                                                                                                                                                                                                                                                                |
| Quantitative variables       | 11      | Explain how quantitative variables were handled in the analyses. If applicable, describe which groupings were chosen and why                                                                                                                                                                                                                                                                                                                                                                                                                                                                                                                                                                             |
| Statistical methods          | 12      | (a) Describe all statistical methods, including those used to control for confounding<br>(b) Describe any methods used to examine subgroups and interactions<br>(c) Explain how missing data were addressed<br>(d) <i>Cohort study</i> —If applicable, explain how loss to follow-up was addressed<br><i>Case-control study</i> —If applicable, explain how matching of cases and controls was addressed<br><i>Cross-sectional study</i> —If applicable, describe analytical methods taking account of sampling strategy<br>(e) Describe any sensitivity analyses                                                                                                                                        |

Continued on next page

**Results**

|                  |     |                                                                                                                                                                                                                                                                                                                                                                                                                      |
|------------------|-----|----------------------------------------------------------------------------------------------------------------------------------------------------------------------------------------------------------------------------------------------------------------------------------------------------------------------------------------------------------------------------------------------------------------------|
| Participants     | 13* | (a) Report numbers of individuals at each stage of study—eg numbers potentially eligible, examined for eligibility, confirmed eligible, included in the study, completing follow-up, and analysed 8<br>(b) Give reasons for non-participation at each stage<br>(c) Consider use of a flow diagram                                                                                                                    |
| Descriptive data | 14* | (a) Give characteristics of study participants (eg demographic, clinical, social) and information on exposures and potential confounders 8<br>(b) Indicate number of participants with missing data for each variable of interest<br>(c) <i>Cohort study</i> —Summarise follow-up time (eg, average and total amount)                                                                                                |
| Outcome data     | 15* | <i>Cohort study</i> —Report numbers of outcome events or summary measures over time 9, 10, 11, 12<br><i>Case-control study</i> —Report numbers in each exposure category, or summary measures of exposure 9, 10, 11, 12<br><i>Cross-sectional study</i> —Report numbers of outcome events or summary measures                                                                                                        |
| Main results     | 16  | (a) Give unadjusted estimates and, if applicable, confounder-adjusted estimates and their precision (eg, 95% confidence interval). Make clear which confounders were adjusted for and why they were included 11, 12<br>(b) Report category boundaries when continuous variables were categorized<br>(c) If relevant, consider translating estimates of relative risk into absolute risk for a meaningful time period |
| Other analyses   | 17  | Report other analyses done—eg analyses of subgroups and interactions, and sensitivity analyses                                                                                                                                                                                                                                                                                                                       |

**Discussion**

|                  |    |                                                                                                                                                                               |
|------------------|----|-------------------------------------------------------------------------------------------------------------------------------------------------------------------------------|
| Key results      | 18 | Summarise key results with reference to study objectives 13, 14                                                                                                               |
| Limitations      | 19 | Discuss limitations of the study, taking into account sources of potential bias or imprecision. Discuss both direction and magnitude of any potential bias 15                 |
| Interpretation   | 20 | Give a cautious overall interpretation of results considering objectives, limitations, multiplicity of analyses, results from similar studies, and other relevant evidence 15 |
| Generalisability | 21 | Discuss the generalisability (external validity) of the study results                                                                                                         |

**Other information**

|         |    |                                                                                                                                                               |
|---------|----|---------------------------------------------------------------------------------------------------------------------------------------------------------------|
| Funding | 22 | Give the source of funding and the role of the funders for the present study and, if applicable, for the original study on which the present article is based |
|---------|----|---------------------------------------------------------------------------------------------------------------------------------------------------------------|

\*Give information separately for cases and controls in case-control studies and, if applicable, for exposed and unexposed groups in cohort and cross-sectional studies.

**Note:** An Explanation and Elaboration article discusses each checklist item and gives methodological background and published examples of transparent reporting. The STROBE checklist is best used in conjunction with this article (freely available on the Web sites of PLoS Medicine at <http://www.plosmedicine.org/>, Annals of Internal Medicine at <http://www.annals.org/>, and Epidemiology at <http://www.epidem.com/>). Information on the STROBE Initiative is available at [www.strobe-statement.org](http://www.strobe-statement.org).
